# Supplementary material for: Activation of VIP signaling enhances immunosuppressive effect of MDSCs on CMV-induced adaptive immunity
Source: PubMed Central journal article supplement (PMC5669855; doi:10.18632/oncotarget.20704), 2017-09-07
Supplement: oncotarget-08-81873-s001.pdf [file oncotarget-08-81873-s001.pdf]

# Activation of VIP signaling enhances immunosuppressive effect of MDSCs on CMV-induced adaptive immunity

## SUPPLEMENTARY MATERIALS

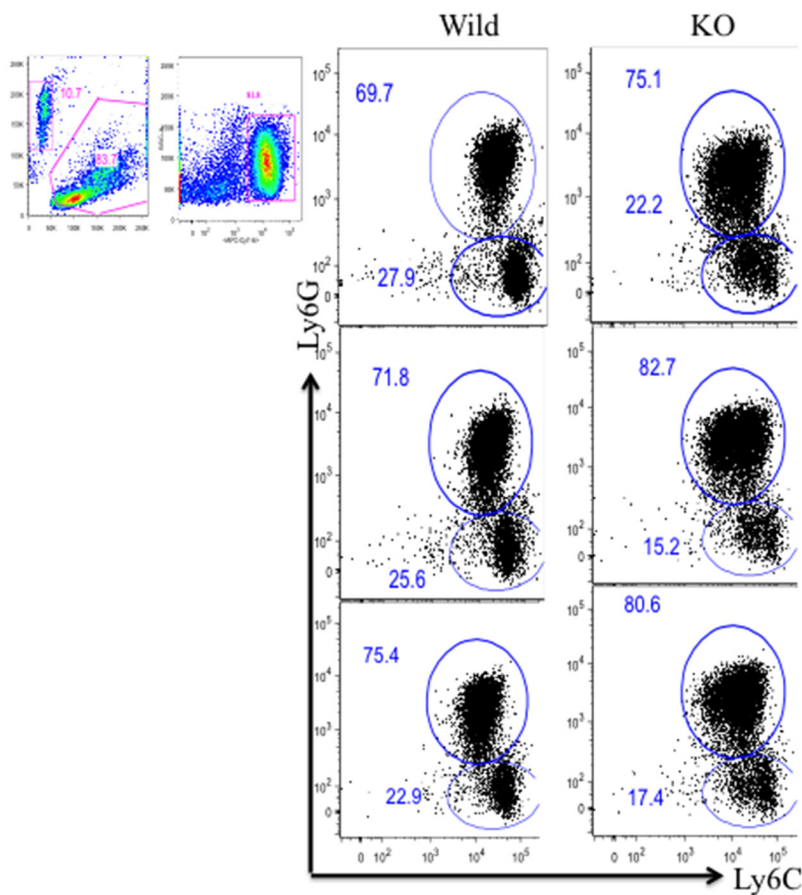

Supplementary Figure 1: Frequencies of IMC and MDSC subpopulations in single cell suspensions from wild type and VIP<sup>-/-</sup> bone marrow.

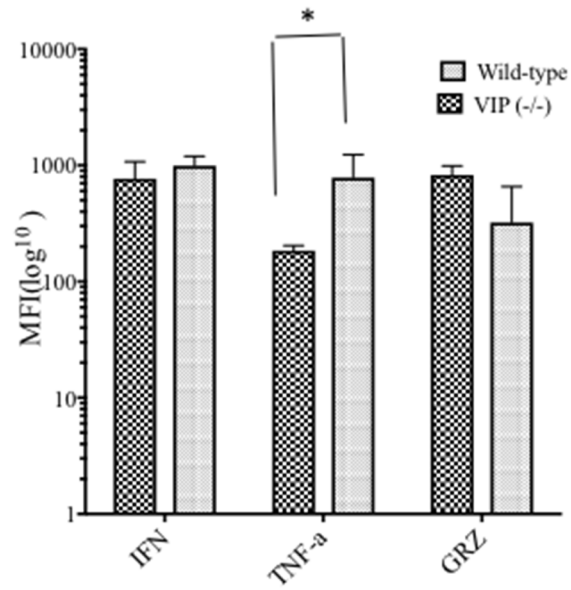

**Supplementary Figure 2: Pro-inflammatory cytokine production in VIP wild type and VIP<sup>-/-</sup> splenocytes following stimulation with IFN- $\gamma$  and LPS .**
